# Supplementary material for: Reaction landscape of a mononuclear MnIII–hydroxo complex with hydrogen peroxide
Source: Royal Society of Chemistry journal article supplement (doi:10.1039/d3dt02672h), 2023-01-01
Supplement: d3dt02672h1.pdf [file d3dt02672h1.pdf]

# Supplementary Information for Reaction Landscape of a Mononuclear Mn<sup>III</sup>-hydroxo Complex with Hydrogen Peroxide

Elizabeth N. Grotemeyer, Joshua D. Parham<sup>†</sup>, and Timothy A. Jackson<sup>\*</sup>

*The University of Kansas, Department of Chemistry and Center for Environmentally Beneficial Catalysis,  
1567 Irving Hill Road, Lawrence, KS 66045, USA.*

\*To whom correspondence should be addressed:

Timothy A. Jackson  
Phone: (785) 864-3968  
taj@ku.edu

<sup>†</sup>Current address: Department of Physical Sciences, University of Central Missouri, Warrensburg, MO  
64093.

**Table S1.** Comparison of spectroscopic characteristics of select bis( $\mu$ -oxo)dimanganese(III,IV) complexes.

| Complex                                                                                | $\lambda$ (nm) | $g$    | $A$ (mT)                                           | Pre-edge Energy (eV) | Pre-edge area | Edge energy (eV) | Ref.         |
|----------------------------------------------------------------------------------------|----------------|--------|----------------------------------------------------|----------------------|---------------|------------------|--------------|
| $[\text{Mn}^{\text{II}}(\text{dpaq}^{2\text{Me}})]^+$                                  | 500            | 2.04   | $NA^b$                                             | 6540.2               | 4.3           | 6548.6           | <sup>1</sup> |
| <b>1</b>                                                                               | 515, 770       | $NA^c$ | $NA^c$                                             | 6540.2               | 4.1           | 6550.0           | <sup>1</sup> |
| <b>2</b>                                                                               | 500, 710       | 2.01   | 7.7                                                | 6540.9<br>6542.6     | 19.4          | 6550.2           | This work    |
| <b>3</b>                                                                               | 610, 770       | $NA^c$ | $NA^c$                                             | 6540.3               | 6.3           | 6550.5           | This work    |
| $[\text{Mn}^{\text{III}}\text{Mn}^{\text{IV}}(\mu\text{-O})_2(\text{N4Py})_2]^{3+}$    | 439, 562, 667  | 2.01   | 7.7                                                | 6540.3<br>6542.0     | 22.9          | 6549.8           | <sup>2</sup> |
| $[\text{Mn}^{\text{III}}\text{Mn}^{\text{IV}}(\mu\text{-O})_2(\text{DMMN4Py})_2]^{3+}$ | 440, 562, 667  | 2.01   | 7.7                                                | 6540.3<br>6542.0     | 19.6          | 6549.8           | <sup>3</sup> |
| $[\text{Mn}^{\text{III}}\text{Mn}^{\text{IV}}(\mu\text{-O})_2(\text{dpaq})_2]^+$       | 540, 660       | 1.996  | $A_x = 16.7^a$<br>$A_y = 14.9^a$<br>$A_z = 14.3^a$ | $NA^d$               | $NA^d$        | $NA^d$           | <sup>4</sup> |

<sup>a</sup> From simulation of the experimental spectrum. <sup>b</sup>Hyperfine splitting was not resolved. <sup>c</sup>1 is EPR silent. <sup>d</sup>XAS has not been performed on this complex.

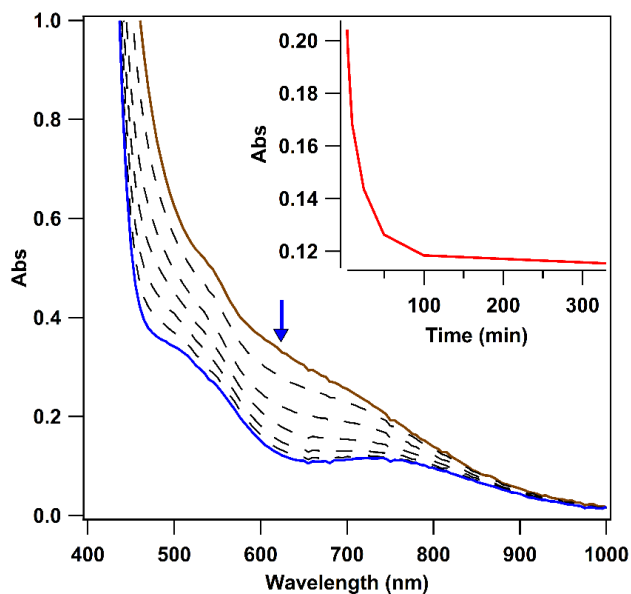

**Figure S1.** Electronic absorption spectra obtained while monitoring the thermal decay of  $[\text{Mn}^{\text{III}}\text{Mn}^{\text{IV}}(\mu\text{-O})_2(\text{dpaq})_2]^+$  (brown trace) to yield  $[\text{Mn}^{\text{III}}(\text{OH})(\text{dpaq})]^+$  (blue trace). Inset: time course of the decay.

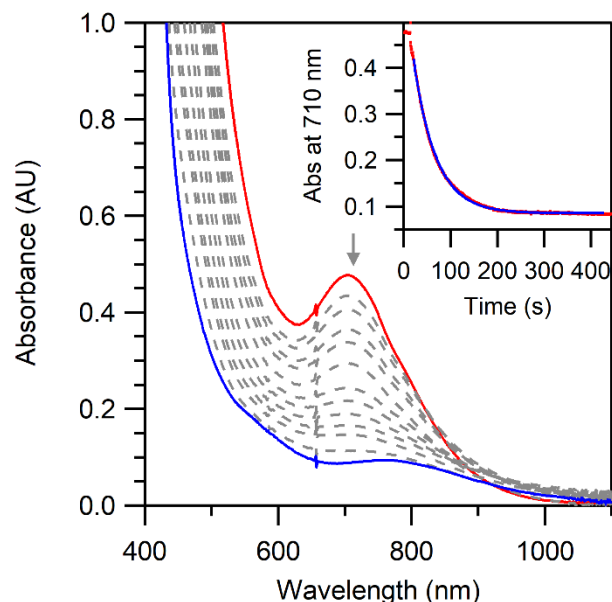

**Figure S2.** Top: Electronic absorption spectra for a solution of **2** (red trace) after addition of 100 equiv. 2,4-di-*tert*-butylphenol at 25°C. The feature at 710 nm decays completely to the blue trace. Inset: Decay trace of the feature at 710 nm over time.

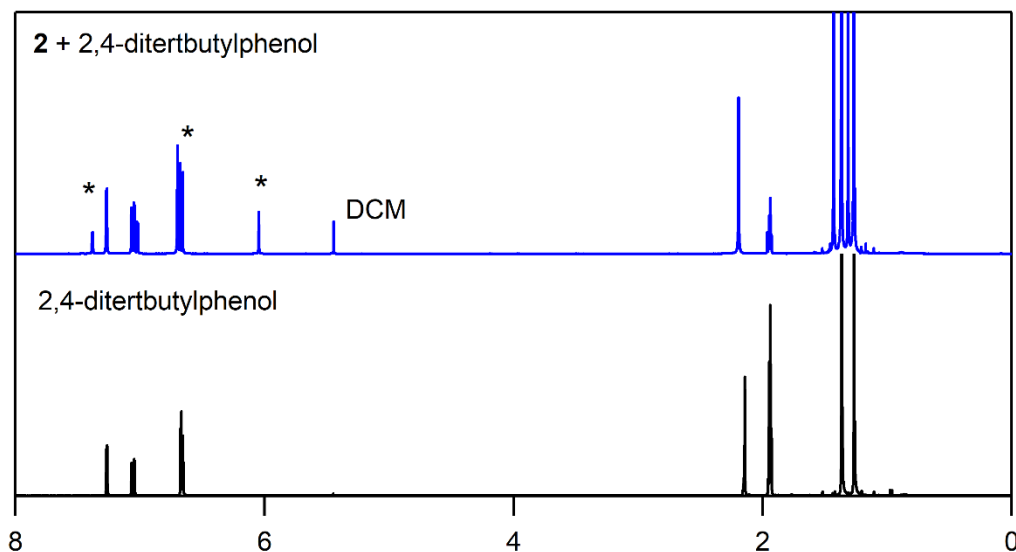

**Figure S3.**  $^1\text{H}$  NMR spectrum for the organic products resulting from the reactions of a 1.25 mM solution of **2** with 5 equiv. 2,4-di-*tert*-butylphenol (blue trace). The  $^1\text{H}$  NMR spectrum of 2,4-di-*tert*-butylphenol is included for comparison. Peaks marked with (\*) arise from the dimeric reaction product **3**, **3'**, **5**, **5'**-*tetra-tert*-butylbiphenyl-2,2'-diol.

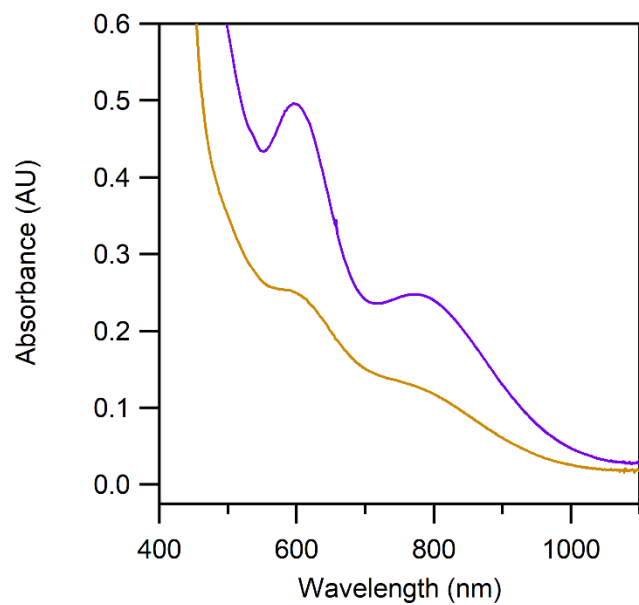

**Figure S4.** Overlay of the electronic absorption spectra for the intermediate in the formation of **2** by the addition of 10 equiv.  $\text{H}_2\text{O}_2$  (brown-green trace) at  $25^\circ\text{C}$  and **3** formed by the addition of 5 equiv.  $\text{H}_2\text{O}_2$  and 0.1 equiv.  $\text{HClO}_4$  at  $-40^\circ\text{C}$  (purple trace).

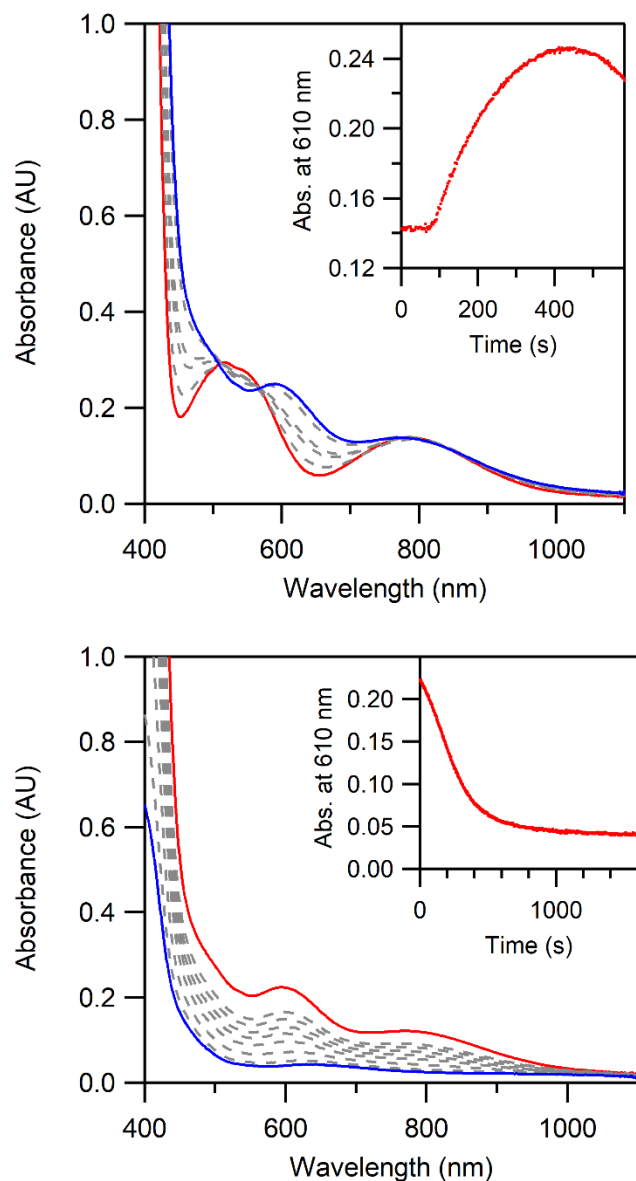

**Figure S5.** Top: Electronic absorption spectra of **3** (blue trace) after the addition of 5 equiv. H<sub>2</sub>O<sub>2</sub> and 1 equiv. perchloric acid to a 1.25 mM solution of [Mn<sup>III</sup>(OH)(dpaq<sup>2Me</sup>)]<sup>+</sup> in MeCN at -40°C (red trace). Inset: Time trace indicating the growth of the feature at 610 nm. Bottom: Electronic absorption spectra of the self-decay of **3** in MeCN at -40°C. Inset: Decay trace of the feature at 610 nm over time.

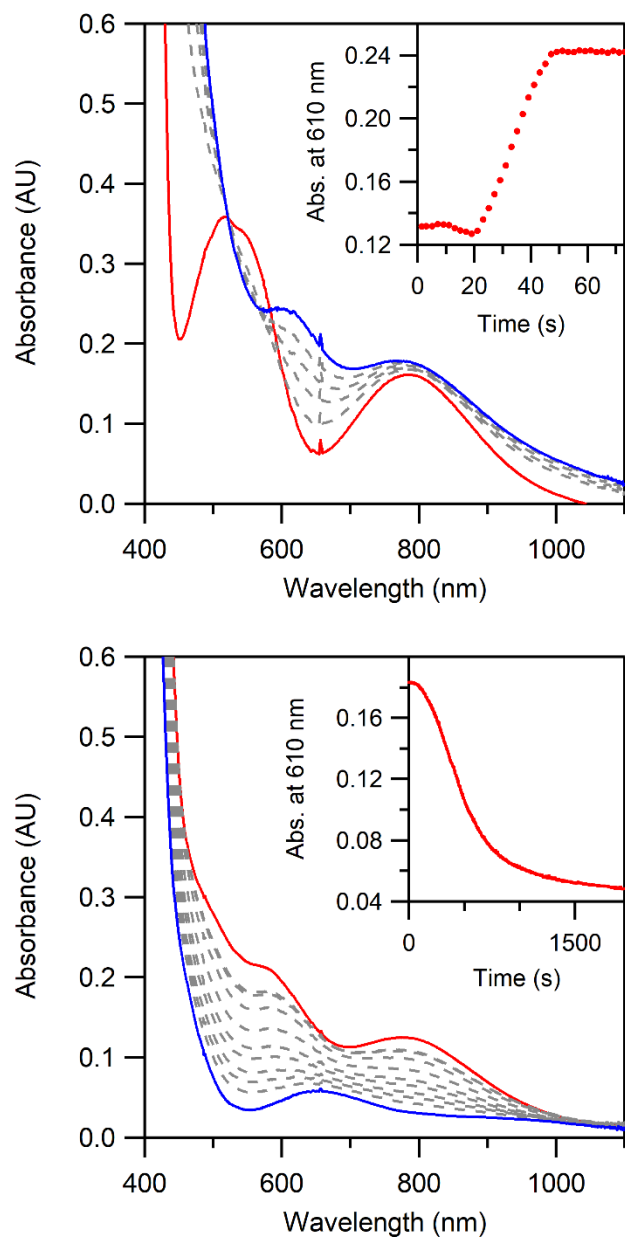

**Figure S6.** Top: Electronic absorption spectra of **3** (blue trace) formed after the addition of 5 equiv.  $\text{H}_2\text{O}_2$  and 1 equiv. acetic acid to a 1.25 mM solution of  $[\text{Mn}^{\text{III}}(\text{OH})(\text{dpaq}^{2\text{Me}})]^+$  (red trace) in MeCN at  $-40^\circ\text{C}$ . Inset: Time trace indicating the growth of the features at 610 nm. Bottom: Electronic absorption spectra of the self-decay of **3** (formed using acetic acid) in MeCN at  $-40^\circ\text{C}$ . Inset: Decay trace of the feature at 610 nm over time.

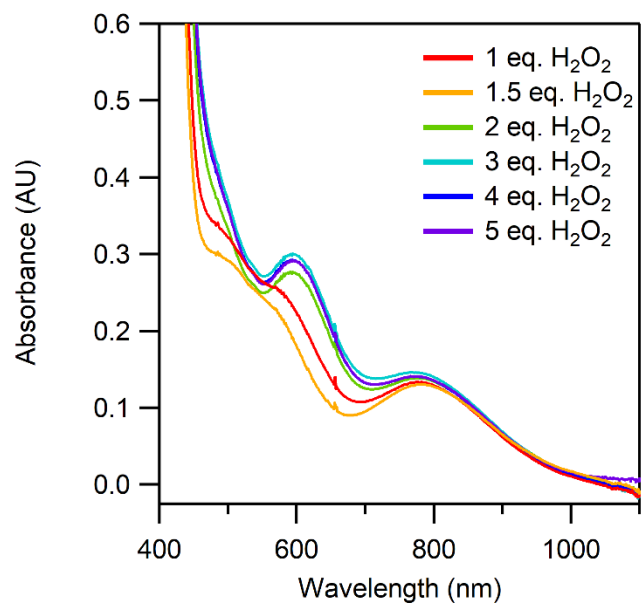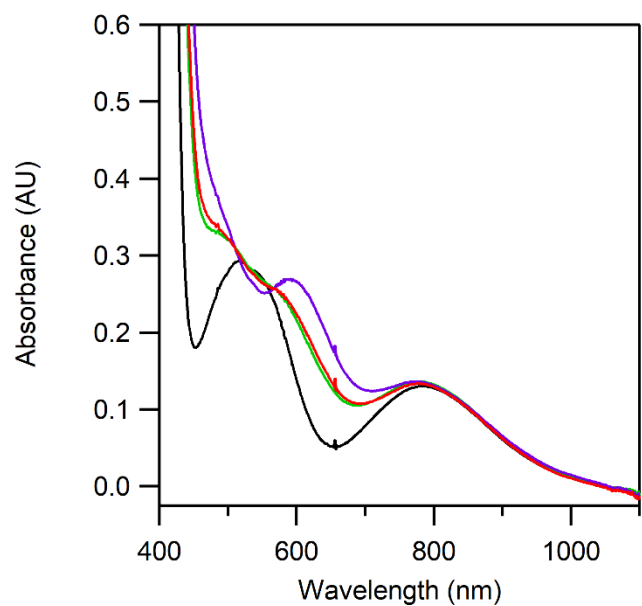

**Figure S7.** Top: Electronic absorption spectra for the addition of 1-5 equivalents of  $\text{H}_2\text{O}_2$  and 0.1 equiv.  $\text{HClO}_4$  to a 1.25 mM solution of  $[\text{Mn}^{\text{III}}(\text{OH})(\text{dpaq}^{2\text{Mc}})]^+$  at  $-40^\circ\text{C}$ . Bottom: Electronic absorption spectra for the addition of 1 equiv.  $\text{H}_2\text{O}_2$  and 0.1 equiv.  $\text{HClO}_4$  (red). This trace can be described as a linear combination of **1** (black trace), and **3** (purple trace). The linear combination that best reproduces the experimental spectrum requires a 0.46:0.54 ratio of **1**:**3** (green trace).

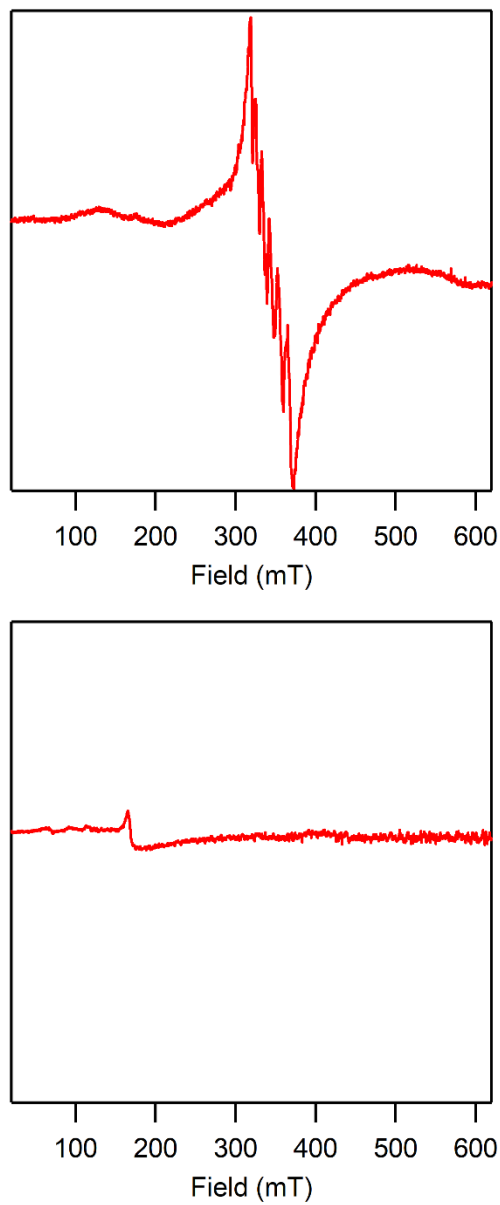

**Figure S8.** 7.5 K perpendicular-mode (top) and parallel-mode (bottom) EPR spectra of **3** obtained following the reaction of a 3 mM solution of  $[\text{Mn}^{\text{III}}(\text{OH})(\text{dpaq}^{2\text{Me}})]^+$  with 5 equiv.  $\text{H}_2\text{O}_2$  and 0.1 equiv.  $\text{HClO}_4$  in 1:1 MeCN:toluene at  $-40^\circ\text{C}$ . The weak feature near 180 mT in the bottom spectrum is from  $\text{O}_2$ .



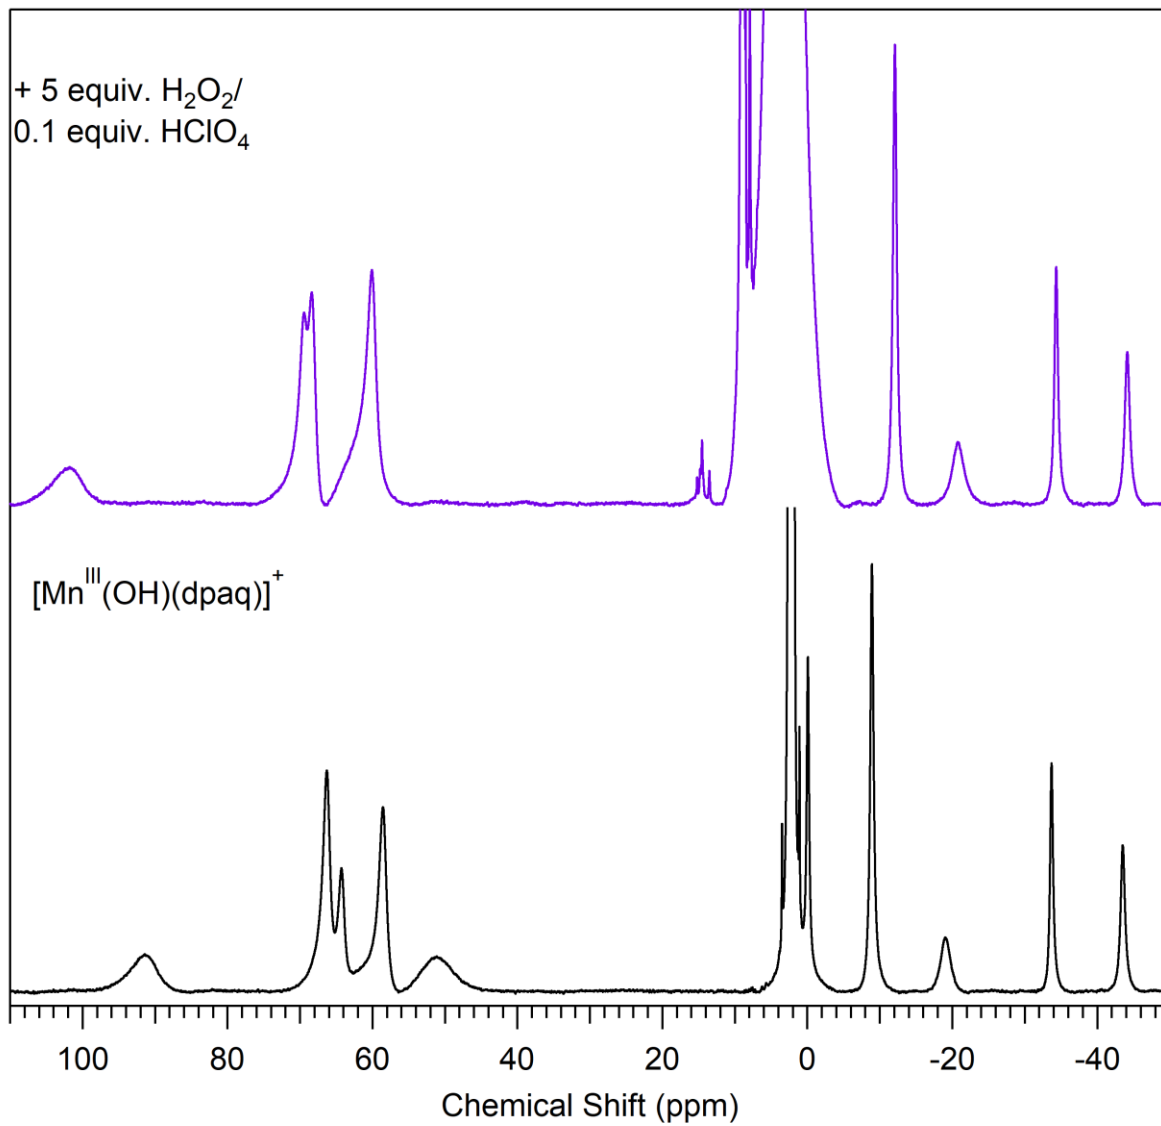

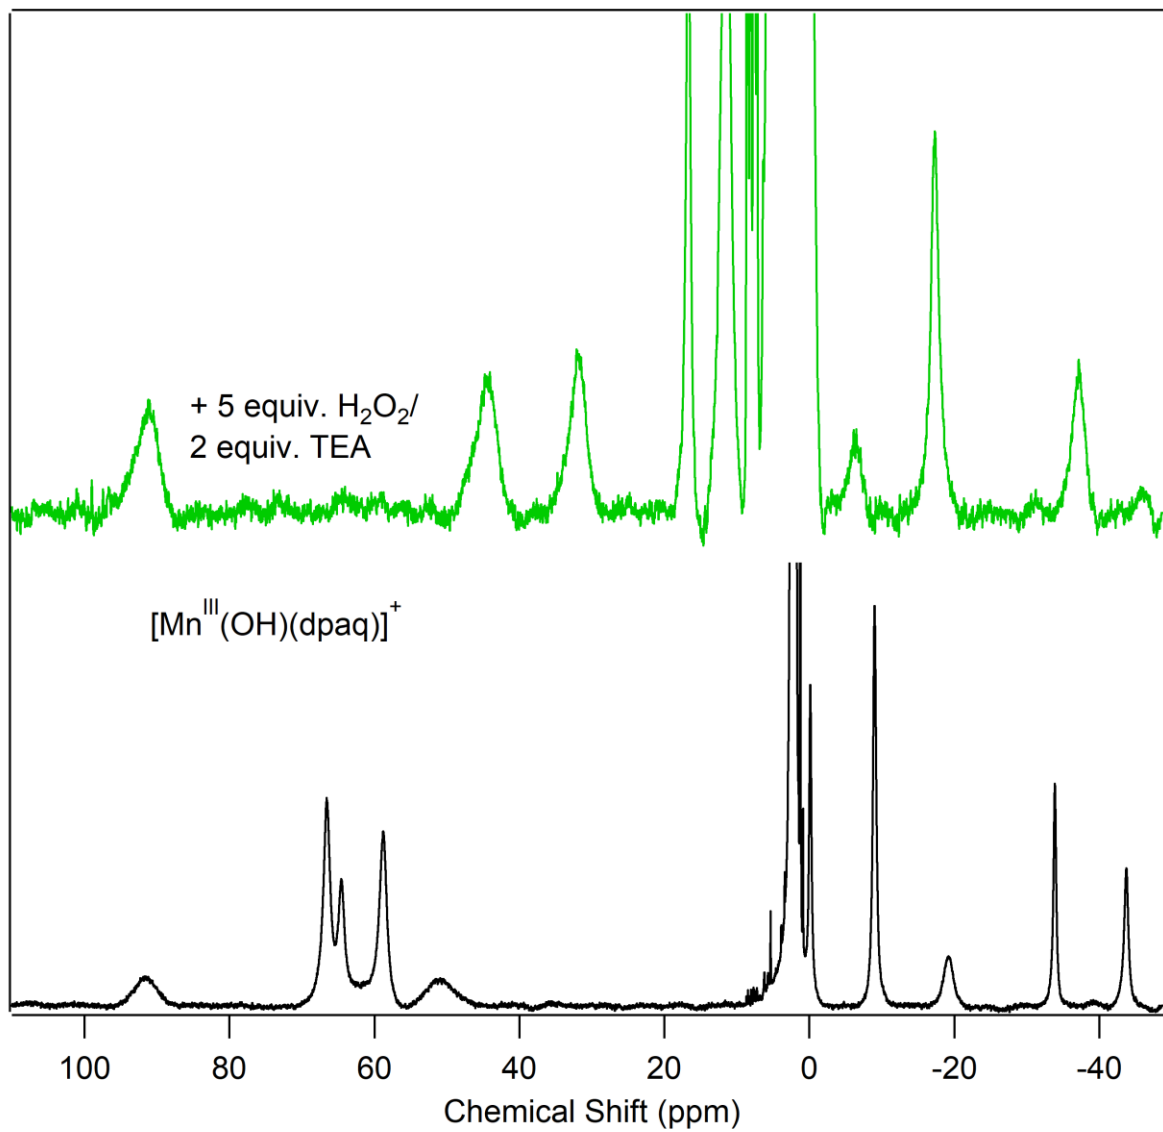

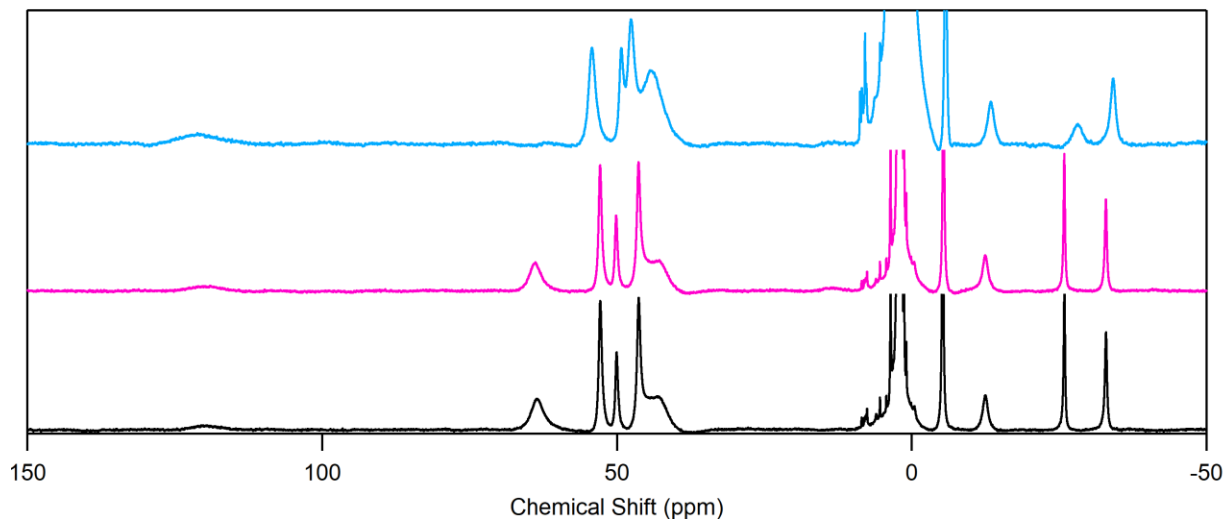

**Figure S9. Top (page S9):** Low temperature  $^1\text{H}$  NMR spectra of 3 mM **1** (black trace) in  $d_3$ -MeCN and a 3 mM solution of **3** formed with 5 equiv.  $\text{H}_2\text{O}_2$  and 0.1 equiv.  $\text{HClO}_4$  (purple trace) in  $d_3$ -MeCN. **Center (page S10):** Expanded view of the Low temperature  $^1\text{H}$  NMR spectra of 3 mM **1** (black trace) in  $d_3$ -MeCN and a 3 mM solution of **4** formed with 10 equivalents each of  $\text{H}_2\text{O}_2$  and  $\text{Et}_3\text{N}$  (green trace) in  $d_3$ -MeCN. Spectra were collected at  $-40^\circ\text{C}$ . **Bottom (page S11):**  $^1\text{H}$  NMR spectra of 3 mM **1** (black trace, bottom) in  $d_3$ -MeCN, a 3 mM solution of **1** in the presence of 10 equiv.  $\text{D}_2\text{O}$  in  $d_3$ -MeCN (pink trace, middle) and a 3 mM solution of **1** in the presence of 10 equiv.  $\text{D}_2\text{O}$  and 0.2 equiv.  $\text{HClO}_4$  in  $d_3$ -MeCN (blue trace, top).

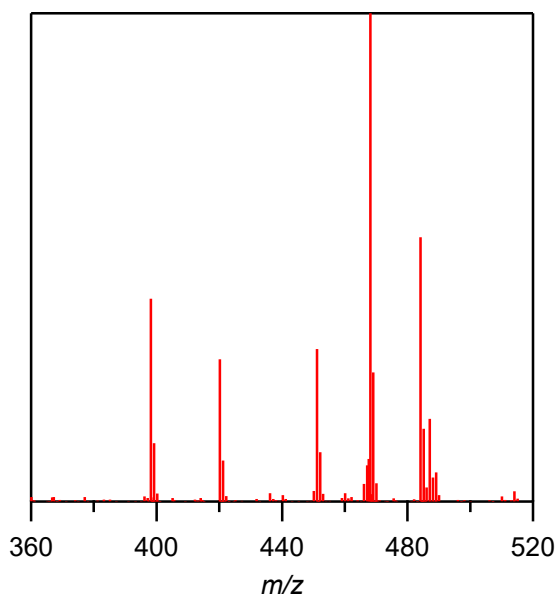

**Figure S10.** ESI-MS data for **3**. Peaks are assigned as follows:  $m/z = 484.1$   $[\text{Mn}^{\text{III}}(\text{OOH})(\text{dpaq}^{2\text{Me}})]^+$ ;  $m/z = 468.1$   $[\text{Mn}^{\text{III}}(\text{OH})(\text{dpaq}^{2\text{Me}})]^+$ ;  $m/z = 451.1$   $[\text{Mn}^{\text{II}}(\text{dpaq}^{2\text{Me}})]^+$ ;  $m/z = 420.1$   $\text{Na}^+\text{dpaq}^{2\text{Me}}\text{H}$ ;  $m/z = 398.2$   $\text{dpaq}^{2\text{Me}}\text{H}_2^+$ .

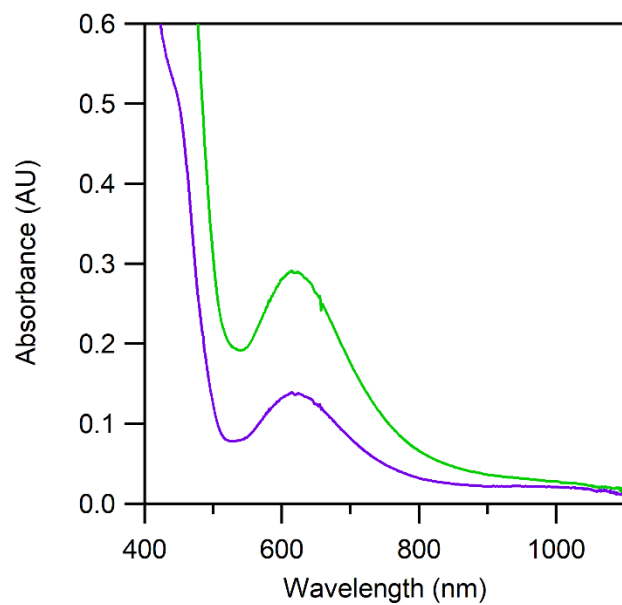

**Figure S11.** Overlay of electronic absorption spectra of **4** formed by the simultaneous addition of 5 equiv.  $\text{H}_2\text{O}_2$  and 2 equiv.  $\text{Et}_3\text{N}$  (green trace) with the final spectrum of the reaction of **3** with 2 equiv.  $\text{Et}_3\text{N}$  (purple trace).

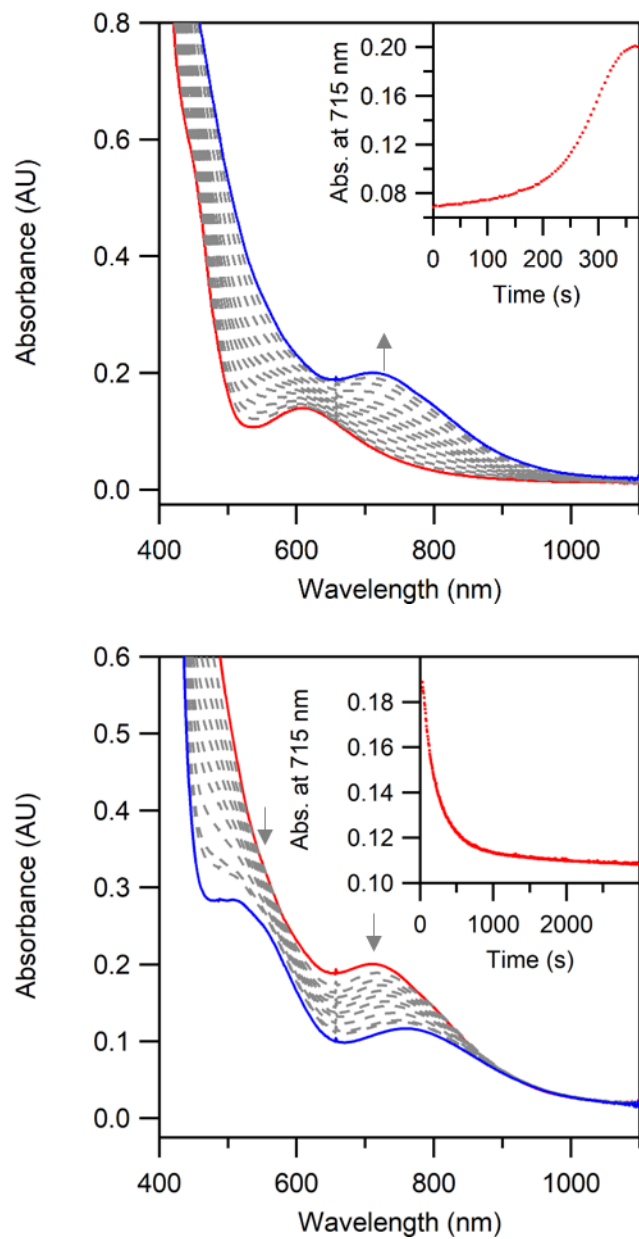

**Figure S12.** Top: Electronic absorption spectra for the self-decay of **4** (red trace) in MeCN to form **2** (blue trace) at 25°C. Inset: Time trace indicating the growth of the feature at 710 nm. Bottom: Electronic absorption spectra of the self-decay of **2** formed from the initial decay of **4** (red trace) in MeCN to form **1** (blue trace) at 25°C. Inset: Decay trace of the feature at 710 nm over time.

**Table S2.** Compositions and energies of  $\alpha$ -spin MOs for  $[\text{Mn}^{\text{III}}(\text{OH})(\text{dpaq}^{2\text{Me}})]^+$  (**1**) from DFT Computations

| Orbital                                          | 105a                                                                               | 108a                                                                               | 113a                                                                               | 114a                                                                               | 120a                                                                                | 121a                                                                                 | 123a                                                                                 |
|--------------------------------------------------|------------------------------------------------------------------------------------|------------------------------------------------------------------------------------|------------------------------------------------------------------------------------|------------------------------------------------------------------------------------|-------------------------------------------------------------------------------------|--------------------------------------------------------------------------------------|--------------------------------------------------------------------------------------|
|                                                  | dxz ( $\alpha$ )                                                                   | dxy ( $\alpha$ )                                                                   | dxy/yz ( $\alpha$ )                                                                | dxy ( $\alpha$ )                                                                   | dxz ( $\alpha$ )                                                                    | $dx^2-y^2$ ( $\alpha$ )                                                              | $dz^2$ ( $\alpha$ )                                                                  |
| Energy (eV)                                      | -9.105                                                                             | -8.707                                                                             | -7.663                                                                             | -6.194                                                                             | -6.366                                                                              | -5.349                                                                               | -2.646                                                                               |
| Occ.                                             | 1                                                                                  | 1                                                                                  | 1                                                                                  | 1                                                                                  | 1                                                                                   | 1                                                                                    | 0                                                                                    |
| <b>LÖWDIN REDUCED ORBITAL POPULATIONS PER MO</b> |                                                                                    |                                                                                    |                                                                                    |                                                                                    |                                                                                     |                                                                                      |                                                                                      |
|                                                  | 0                                                                                  | 0.4                                                                                | 1.1                                                                                | 0.2                                                                                | 0                                                                                   | 0.9                                                                                  | 50.3                                                                                 |
| xz                                               | 21.2                                                                               | 0.4                                                                                | 0.6                                                                                | 0                                                                                  | 17.3                                                                                | 0.6                                                                                  | 1.2                                                                                  |
| yz                                               | 3.2                                                                                | 6.6                                                                                | 16.4                                                                               | 0.8                                                                                | 0.2                                                                                 | 0.1                                                                                  | 0                                                                                    |
| $x^2-y^2$                                        | 0                                                                                  | 0.1                                                                                | 0                                                                                  | 0                                                                                  | 0                                                                                   | 46.8                                                                                 | 0.6                                                                                  |
| xy                                               | 2.3                                                                                | 22.6                                                                               | 19.2                                                                               | 16.8                                                                               | 0                                                                                   | 0                                                                                    | 0.1                                                                                  |
| $p_z$ (O)                                        | 0.5                                                                                | 1                                                                                  | 9.8                                                                                | 1.3                                                                                | 0.1                                                                                 | 0.4                                                                                  | 8.7                                                                                  |
| $p_x$ (O)                                        | 5.5                                                                                | 0.1                                                                                | 3.4                                                                                | 0.3                                                                                | 27.4                                                                                | 0.3                                                                                  | 0.1                                                                                  |
| $p_y$ (O)                                        | 0.9                                                                                | 0.1                                                                                | 6.4                                                                                | 1.4                                                                                | 0.5                                                                                 | 0.1                                                                                  | 0.3                                                                                  |
| $p_z$ (Namide)                                   | 0.0                                                                                | 0.9                                                                                | 1.8                                                                                | 0.0                                                                                | 0.5                                                                                 | 0.0                                                                                  | 5.7                                                                                  |
| $p_x$ (Namide)                                   | 0.0                                                                                | 0.0                                                                                | 0.0                                                                                | 0.0                                                                                | 1.7                                                                                 | 0.0                                                                                  | 0.1                                                                                  |
| $p_y$ (Namide)                                   | 0.0                                                                                | 0.1                                                                                | 2.5                                                                                | 6.8                                                                                | 0.0                                                                                 | 0.0                                                                                  | 0.1                                                                                  |
|                                                  | 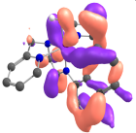 |  |  |  |  |  |  |

**Table S3.** Compositions and energies of  $\beta$ -spin MOs for  $[\text{Mn}^{\text{III}}(\text{OH})(\text{dpaq}^{2\text{Me}})]^+$  (**1**) from DFT Computations

| Orbital                                          | 119b                                                                               | 120b                                                                               | 122b                                                                               | 123b                                                                               | 124b                                                                                | 128b                                                                                 | 129b                                                                                 |
|--------------------------------------------------|------------------------------------------------------------------------------------|------------------------------------------------------------------------------------|------------------------------------------------------------------------------------|------------------------------------------------------------------------------------|-------------------------------------------------------------------------------------|--------------------------------------------------------------------------------------|--------------------------------------------------------------------------------------|
|                                                  | dxy ( $\beta$ )                                                                    | dyz ( $\beta$ )                                                                    | dxz ( $\beta$ )                                                                    | dxz/xy ( $\beta$ )                                                                 | dyz ( $\beta$ )                                                                     | dx <sup>2</sup> -y <sup>2</sup> ( $\beta$ )                                          | dz <sup>2</sup> ( $\beta$ )                                                          |
| Energy (eV)                                      | -2.687                                                                             | -2.321                                                                             | -1.993                                                                             | -1.790                                                                             | -1.427                                                                              | -0.718                                                                               | -0.686                                                                               |
| Occ.                                             | 0                                                                                  | 0                                                                                  | 0                                                                                  | 0                                                                                  | 0                                                                                   | 0                                                                                    | 0                                                                                    |
| <b>LÖWDIN REDUCED ORBITAL POPULATIONS PER MO</b> |                                                                                    |                                                                                    |                                                                                    |                                                                                    |                                                                                     |                                                                                      |                                                                                      |
| z <sup>2</sup>                                   | 0                                                                                  | 0                                                                                  | 0.6                                                                                | 0.2                                                                                | 0.6                                                                                 | 0.1                                                                                  | 63.2                                                                                 |
| xz                                               | 0                                                                                  | 0.8                                                                                | 37.1                                                                               | 29.4                                                                               | 0.1                                                                                 | 2.1                                                                                  | 1.3                                                                                  |
| yz                                               | 5.6                                                                                | 33.6                                                                               | 3                                                                                  | 10.2                                                                               | 20.5                                                                                | 0.6                                                                                  | 0.7                                                                                  |
| x <sup>2</sup> -y <sup>2</sup>                   | 0                                                                                  | 0.2                                                                                | 1.1                                                                                | 0.8                                                                                | 0.6                                                                                 | 68.3                                                                                 | 0                                                                                    |
| xy                                               | 21.3                                                                               | 13.3                                                                               | 17.5                                                                               | 17.3                                                                               | 10.1                                                                                | 0.2                                                                                  | 0.1                                                                                  |
| p <sub>z</sub> (O)                               | 0                                                                                  | 0.5                                                                                | 0                                                                                  | 0.1                                                                                | 0                                                                                   | 0                                                                                    | 5.3                                                                                  |
| p <sub>x</sub> (O)                               | 0.1                                                                                | 0                                                                                  | 3.4                                                                                | 3.0                                                                                | 0                                                                                   | 0.3                                                                                  | 0                                                                                    |
| p <sub>y</sub> (O)                               | 0                                                                                  | 1.4                                                                                | 0                                                                                  | 0.3                                                                                | 0.2                                                                                 | 0                                                                                    | 0.1                                                                                  |
| p <sub>z</sub> (N <sub>amide</sub> )             | 0.0                                                                                | 0.0                                                                                | 0.0                                                                                | 0.0                                                                                | 0.0                                                                                 | 0.1                                                                                  | 3.1                                                                                  |
| p <sub>x</sub> (N <sub>amide</sub> )             | 0.0                                                                                | 0.7                                                                                | 0.0                                                                                | 0.2                                                                                | 0.0                                                                                 | 0.0                                                                                  | 0.0                                                                                  |
| p <sub>y</sub> (N <sub>amide</sub> )             | 0.0                                                                                | 0.0                                                                                | 0.0                                                                                | 0.0                                                                                | 0.0                                                                                 | 0.0                                                                                  | 0.4                                                                                  |
|                                                  | 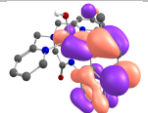 |  |  |  |  |  |  |

**Table S4.** Compositions and energies of  $\alpha$ -spin MOs for  $[\text{Mn}^{\text{III}}(\text{OOH})(\text{dpaq}^{2\text{Me}})]^+$  (**3**) from DFT Computations

| Orbital                                          | 113a                                                                                | 116a                                                                                | 117a                                                                                | 123a                                                                                | 125a                                                                                  | 127a                                                                                  |
|--------------------------------------------------|-------------------------------------------------------------------------------------|-------------------------------------------------------------------------------------|-------------------------------------------------------------------------------------|-------------------------------------------------------------------------------------|---------------------------------------------------------------------------------------|---------------------------------------------------------------------------------------|
|                                                  | d <sub>yz</sub>                                                                     | d <sub>yz</sub>                                                                     | d <sub>xy</sub>                                                                     | d <sub>xz</sub>                                                                     | d <sub>x<sup>2</sup>-y<sup>2</sup></sub>                                              | d <sub>z<sup>2</sup></sub>                                                            |
| Energy (eV)                                      | -8.422                                                                              | -7.899                                                                              | -7.534                                                                              | -6.417                                                                              | -5.486                                                                                | -2.820                                                                                |
| Occ.                                             | 1                                                                                   | 1                                                                                   | 1                                                                                   | 1                                                                                   | 1                                                                                     | 0                                                                                     |
| <b>LÖWDIN REDUCED ORBITAL POPULATIONS PER MO</b> |                                                                                     |                                                                                     |                                                                                     |                                                                                     |                                                                                       |                                                                                       |
| d <sub>z<sup>2</sup></sub>                       | 0.3                                                                                 | 0.1                                                                                 | 0.6                                                                                 | 0.9                                                                                 | 0.3                                                                                   | 50.4                                                                                  |
| d <sub>xz</sub>                                  | 3.6                                                                                 | 0.5                                                                                 | 0.2                                                                                 | 12.3                                                                                | 0.3                                                                                   | 1.0                                                                                   |
| d <sub>yz</sub>                                  | 19.9                                                                                | 13.7                                                                                | 2.2                                                                                 | 1.8                                                                                 | 0.0                                                                                   | 0.0                                                                                   |
| d <sub>x<sup>2</sup>-y<sup>2</sup></sub>         | 0.0                                                                                 | 0.7                                                                                 | 0.5                                                                                 | 0.2                                                                                 | 42.2                                                                                  | 0.2                                                                                   |
| d <sub>xy</sub>                                  | 2.8                                                                                 | 1.1                                                                                 | 26.6                                                                                | 0.3                                                                                 | 0.9                                                                                   | 0.0                                                                                   |
| p <sub>z</sub> (O <sub>prox</sub> )              | 1.3                                                                                 | 0.1                                                                                 | 1.6                                                                                 | 7.3                                                                                 | 0.3                                                                                   | 11.9                                                                                  |
| p <sub>x</sub> (O <sub>prox</sub> )              | 2.0                                                                                 | 0.3                                                                                 | 0.1                                                                                 | 18.4                                                                                | 0.1                                                                                   | 0.3                                                                                   |
| p <sub>y</sub> (O <sub>prox</sub> )              | 0.6                                                                                 | 0.2                                                                                 | 0.5                                                                                 | 15.5                                                                                | 0.1                                                                                   | 0.6                                                                                   |
| p <sub>z</sub> (O <sub>dist</sub> )              | 1.4                                                                                 | 0.0                                                                                 | 1.1                                                                                 | 15.7                                                                                | 0.2                                                                                   | 2.0                                                                                   |
| p <sub>x</sub> (O <sub>dist</sub> )              | 3.5                                                                                 | 0.0                                                                                 | 0.0                                                                                 | 2.9                                                                                 | 0.0                                                                                   | 0                                                                                     |
| p <sub>y</sub> (O <sub>dist</sub> )              | 0.3                                                                                 | 0.5                                                                                 | 0.4                                                                                 | 3.9                                                                                 | 0.0                                                                                   | 0                                                                                     |
| p <sub>z</sub> (N <sub>amide</sub> )             | 0.1                                                                                 | 0.1                                                                                 | 0.1                                                                                 | 1.4                                                                                 | 0.0                                                                                   | 5.8                                                                                   |
| p <sub>x</sub> (N <sub>amide</sub> )             | 0.0                                                                                 | 0.0                                                                                 | 0.0                                                                                 | 0.0                                                                                 | 0.1                                                                                   | 0.1                                                                                   |
| p <sub>y</sub> (N <sub>amide</sub> )             | 0.2                                                                                 | 0.2                                                                                 | 3.3                                                                                 | 0.5                                                                                 | 0.9                                                                                   | 0.1                                                                                   |
|                                                  | 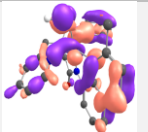 |  |  |  |  |  |



**Table S5.** Compositions and energies of  $\beta$ -spin MOs for  $[\text{Mn}^{\text{III}}(\text{OOH})(\text{dpaq}^{2\text{Me}})]^+$  (**3**) from DFT Computations

| Orbital                                          | 125b                                                                                | 126b                                                                                | 127b                                                                                | 128b                                                                                | 132b                                                                                  | 133b                                                                                  |
|--------------------------------------------------|-------------------------------------------------------------------------------------|-------------------------------------------------------------------------------------|-------------------------------------------------------------------------------------|-------------------------------------------------------------------------------------|---------------------------------------------------------------------------------------|---------------------------------------------------------------------------------------|
|                                                  | dxz                                                                                 | dxy                                                                                 | dxz/xy                                                                              | dyz                                                                                 | $dx^2-y^2$                                                                            | $dz^2$                                                                                |
| Energy (eV)                                      | -2.241                                                                              | -2.028                                                                              | -1.808                                                                              | -1.489                                                                              | -0.896                                                                                | -0.808                                                                                |
| Occ.                                             | 0                                                                                   | 0                                                                                   | 0                                                                                   | 0                                                                                   | 0                                                                                     | 0                                                                                     |
| <b>LÖWDIN REDUCED ORBITAL POPULATIONS PER MO</b> |                                                                                     |                                                                                     |                                                                                     |                                                                                     |                                                                                       |                                                                                       |
| $dz^2$                                           | 0.9                                                                                 | 0.5                                                                                 | 0.1                                                                                 | 0.9                                                                                 | 6.6                                                                                   | 56.7                                                                                  |
| dxz                                              | 37.3                                                                                | 0                                                                                   | 23.7                                                                                | 0.7                                                                                 | 2.8                                                                                   | 0.5                                                                                   |
| dyz                                              | 1.5                                                                                 | 1.1                                                                                 | 5.8                                                                                 | 19.2                                                                                | 0.7                                                                                   | 1.8                                                                                   |
| $dx^2-y^2$                                       | 1.5                                                                                 | 1.2                                                                                 | 0.1                                                                                 | 2.9                                                                                 | 58                                                                                    | 6.8                                                                                   |
| dxy                                              | 18.3                                                                                | 7.8                                                                                 | 17.7                                                                                | 7.6                                                                                 | 0.1                                                                                   | 0.7                                                                                   |
| $p_z$ ( $O_{\text{prox}}$ )                      | 0                                                                                   | 0.1                                                                                 | 0                                                                                   | 0                                                                                   | 0.6                                                                                   | 5.4                                                                                   |
| $p_x$ ( $O_{\text{prox}}$ )                      | 2.3                                                                                 | 0                                                                                   | 1.7                                                                                 | 0.6                                                                                 | 0.3                                                                                   | 0.1                                                                                   |
| $p_y$ ( $O_{\text{prox}}$ )                      | 2.4                                                                                 | 0.1                                                                                 | 0.6                                                                                 | 0                                                                                   | 0                                                                                     | 0.3                                                                                   |
| $p_z$ ( $O_{\text{dist}}$ )                      | 0.1                                                                                 | 0                                                                                   | 0.2                                                                                 | 0.3                                                                                 | 0                                                                                     | 0.7                                                                                   |
| $p_x$ ( $O_{\text{dist}}$ )                      | 0.4                                                                                 | 0.1                                                                                 | 0.1                                                                                 | 0.2                                                                                 | 0                                                                                     | 0.1                                                                                   |
| $p_y$ ( $O_{\text{dist}}$ )                      | 0.2                                                                                 | 0                                                                                   | 0                                                                                   | 0                                                                                   | 0                                                                                     | 0                                                                                     |
| $p_z$ ( $N_{\text{amide}}$ )                     | 0.0                                                                                 | 0.0                                                                                 | 0.0                                                                                 | 0.0                                                                                 | 0.5                                                                                   | 2.7                                                                                   |
| $p_x$ ( $N_{\text{amide}}$ )                     | 0.1                                                                                 | 0.0                                                                                 | 0.0                                                                                 | 0.0                                                                                 | 0.0                                                                                   | 0.1                                                                                   |
| $p_y$ ( $N_{\text{amide}}$ )                     | 0.1                                                                                 | 0.0                                                                                 | 0.2                                                                                 | 0.1                                                                                 | 0.1                                                                                   | 0.3                                                                                   |
|                                                  | 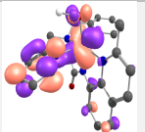 |  |  |  |  |  |

**Table S6.** Electronic Transitions for  $[\text{Mn}^{\text{III}}(\text{OH})(\text{dpaq}^{2\text{Me}})]^+$  (**1**) from TD-DFT Computations

| State | Wavelength | $f_{\text{osc}}$ | transition                 | %            | donor identity       | acceptor identity |                                 | EDDM                                                                                  |
|-------|------------|------------------|----------------------------|--------------|----------------------|-------------------|---------------------------------|---------------------------------------------------------------------------------------|
| 1     | 778.6      | 0.000887         | 121a→123a                  | 88.8         | $x^2-y^2$            | $z^2$             | $x^2-y^2 \rightarrow z^2$       | 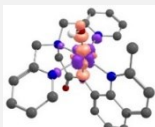   |
| 2     | 535.7      | 0.001237         | 122a→123a                  | 67.0         | yz                   | $z^2$             | $yz \rightarrow z^2$            |    |
| 3     | 501.6      | 0.000267         | 122a→124a<br>118b→119<br>b | 40.5<br>49.4 | qn<br>qn             | qn<br>qn/xy       | N→xy/qn                         |    |
| 4     | 483.5      | 0.00321          | 118a→123a<br>120a→123a     | 25.6<br>35.8 | O/xz<br>O/xz         | $z^2$<br>$z^2$    | $xz \rightarrow z^2$            |    |
| 5     | 401.7      | 0.043872         | 112a→124a<br>118b→119<br>b | 34.2<br>42.2 | $x^2-y^2$<br>qn/N    | qn<br>qn/xy       | N→xy                            |  |
| 6     | 386.6      | 0.001621         | 121a→124a                  | 94.4         | $x^2-y^2$            | qn                | $x^2-y^2 \rightarrow \text{qn}$ |  |
| 7     | 381.9      | 0.020894         | 118b→120<br>b              | 86.8         | N/qn                 | xy/yz             | N→yz                            |  |
| 8     | 380.2      | 0.004355         | 114a→123a<br>115a→123a     | 23.2<br>21.6 | py/yz<br>qn/xz/<br>O | $z^2$<br>$z^2$    | $yz \rightarrow z^2$            |  |
| 9     | 356.1      | 0.018858         | 118b→122<br>b              | 36.6         | qn                   | O/xz              | N→xz                            |  |
| 10    | 353.6      | 0.002423         | 121a→125a                  | 83.4         | $x^2-y^2$            | py                | $x^2-y^2 \rightarrow \text{py}$ |  |

**Table S7.** Electronic Transitions for  $[\text{Mn}^{\text{III}}(\text{OOH})(\text{dpaq}^{2\text{Me}})]^+$  (**3**) from TD-DFT Computations

| State | Wavelength | $f_{\text{osc}}$ | transition                          | %                    | donor identity       | acceptor identity       |                           | EDDM                                                                                  |
|-------|------------|------------------|-------------------------------------|----------------------|----------------------|-------------------------|---------------------------|---------------------------------------------------------------------------------------|
| 1     | 771.4      | 0.001186         | 125a→127a                           | 89.2                 | $x^2-y^2$            | $z^2$                   | $x^2-y^2 \rightarrow z^2$ | 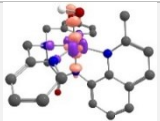   |
| 2     | 579.2      | 0.002166         | 126a→127a                           | 69.6                 | yz                   | $z^2$                   | $xz/yz \rightarrow z^2$   |    |
| 3     | 491.6      | 0.000376         | 126a→128a<br>122b→123b              | 40.3<br>44.5         | qn<br>qn             | qn<br>qn/xy/yz          | $N \rightarrow xy/qn$     |    |
| 4     | 472.4      | 0.004367         | 123a→127a<br>126a→127a              | 39.6<br>22.1         | xz                   | $z^2$<br>$z^2$          | $xz \rightarrow z^2$      |    |
| 5     | 420.2      | 0.011464         | 122b→124b                           | 58.9                 | qn                   | xz/yz                   | $N \rightarrow xz/yz$     |    |
| 6     | 397.4      | 0.023143         | 126a→129a<br>122b→123b<br>122b→124b | 23.1<br>17.5<br>27.5 | qn/N<br>qn/N<br>qn/N | py<br>qn/xy/yz<br>xz/yz | $N \rightarrow x^2-y^2$   |   |
| 7     | 383.1      | 0.010565         | 117a→127a                           | 24.1                 | xy/yz                | $z^2$                   | $xy/xz \rightarrow z^2$   |  |
| 8     | 376.3      | 0.026596         | 122b→125b                           | 70.4                 | qn/N                 | xz/yz                   | $N \rightarrow xz/yz$     |  |
| 9     | 365.5      | 0.005251         | 125a→128a                           | 90.4                 | $x^2-y^2$            | qn                      | $x^2-y^2 \rightarrow qn$  |  |
| 10    | 363.8      | 0.023259         | 124a→127a                           | 35.7                 | O/xz                 | $z^2$                   | $O \rightarrow z^2$       |  |

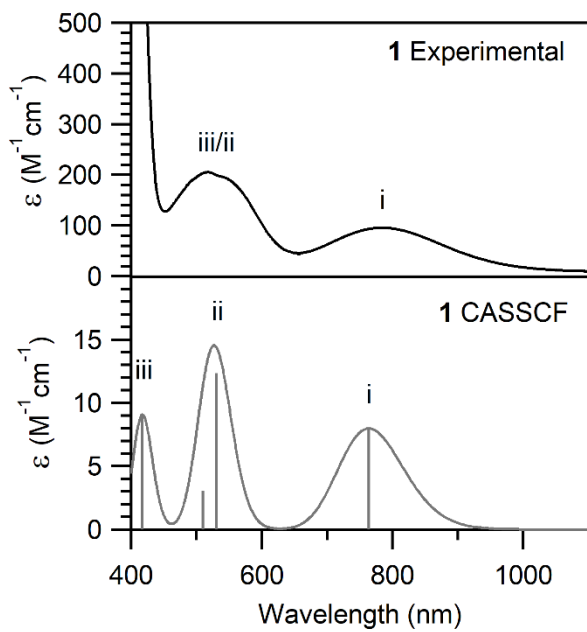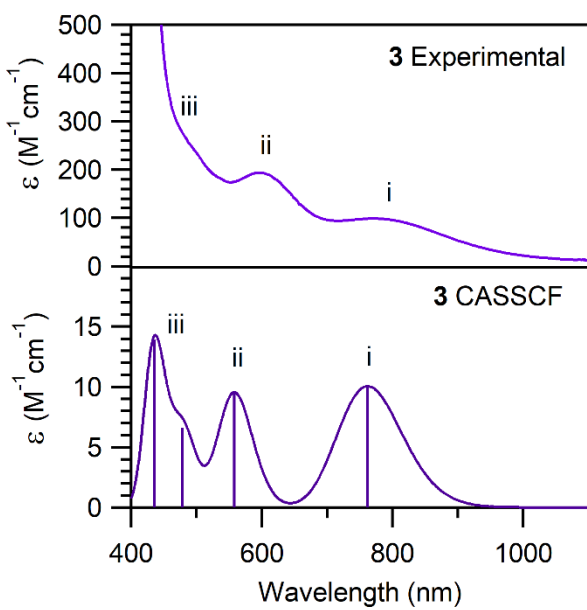

**Figure S13.** Experimental and CASSCF/NEVPT2 calculated UV-vis spectra for **1** (top) and **3** (bottom).

**Table S8.** Electronic Transitions for  $[\text{Mn}^{\text{III}}(\text{OH})(\text{dpaq}^{2\text{Me}})]^+$  (**1**) from CASSCF/NEVPT2 computations

| Root     | Wavelength | fosc     | %                    | donor identity        | acceptor identity |
|----------|------------|----------|----------------------|-----------------------|-------------------|
| <b>1</b> | 667.4      | 8.41E-05 | 78.3<br>20.9         | $x^2-y^2$<br>xy       | $z^2$             |
| <b>2</b> | 436.6      | 0.000138 | 45.2<br>29.0<br>18.0 | xz<br>yz<br>xy        | $z^2$             |
| <b>3</b> | 415.4      | 3.43E-05 | 53.4<br>35.2         | xz<br>yz              | $z^2$             |
| <b>4</b> | 340.7      | 0.000102 | 53.4<br>35.0<br>10.1 | xy<br>yz<br>$x^2-y^2$ | $z^2$             |

**Table S9.** Electronic transitions for  $[\text{Mn}^{\text{III}}(\text{OOH})(\text{dpaq}^{2\text{Me}})]^+$  (**3**) from CASSCF/NEVPT2 computations

| Root     | Wavelength | fosc     | %                    | donor identity              | acceptor identity       |
|----------|------------|----------|----------------------|-----------------------------|-------------------------|
| <b>1</b> | 646.0      | 0.000109 | 67.1<br>20.8         | $x^2-y^2$<br>xy/xz          | $z^2$                   |
| <b>2</b> | 454.6      | 0.000108 | 86.1                 | yz                          | $z^2$                   |
| <b>3</b> | 379.0      | 7.72E-05 | 48.1<br>42.7         | xy/xz<br>xz/xy              | $z^2$                   |
| <b>4</b> | 350.5      | 0.000159 | 39.0<br>33.6<br>26.5 | xy/xz<br>xz/xy<br>$x^2-y^2$ | $z^2$<br>$z^2$<br>$z^2$ |

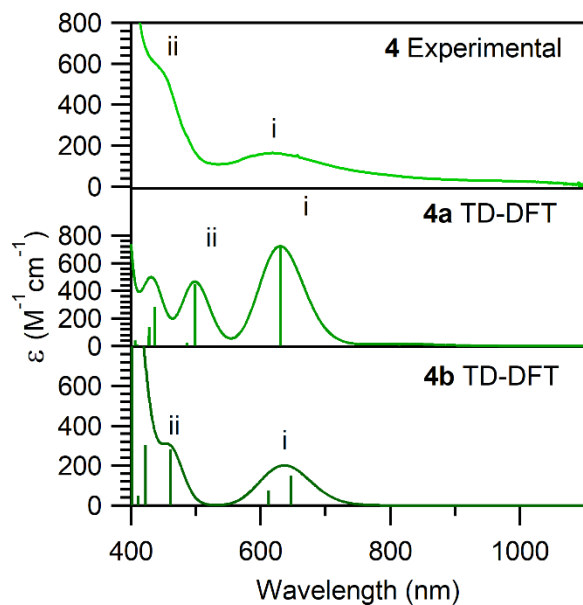

**Figure S14.** Experimental (top) and TD-DFT computed UV-vis spectra for the structure of **4a** (middle) and **4b** (bottom).

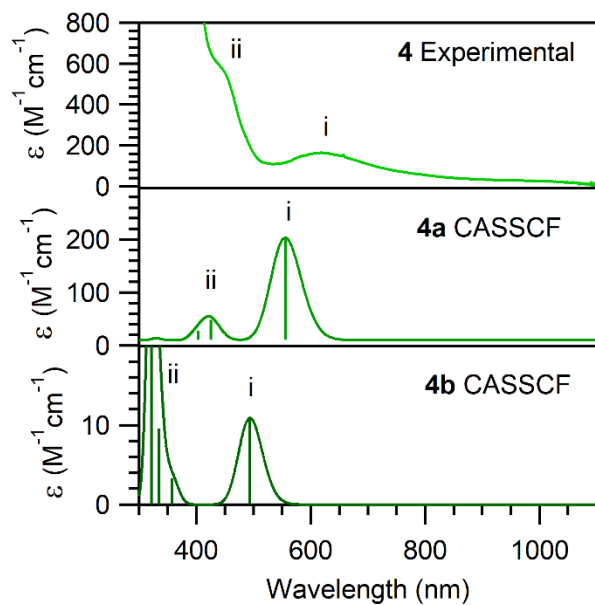

**Figure S15.** Experimental (top) and CASSCF/NEVPT2 calculated UV-vis spectra for **4a** (middle) and **4b** (bottom).

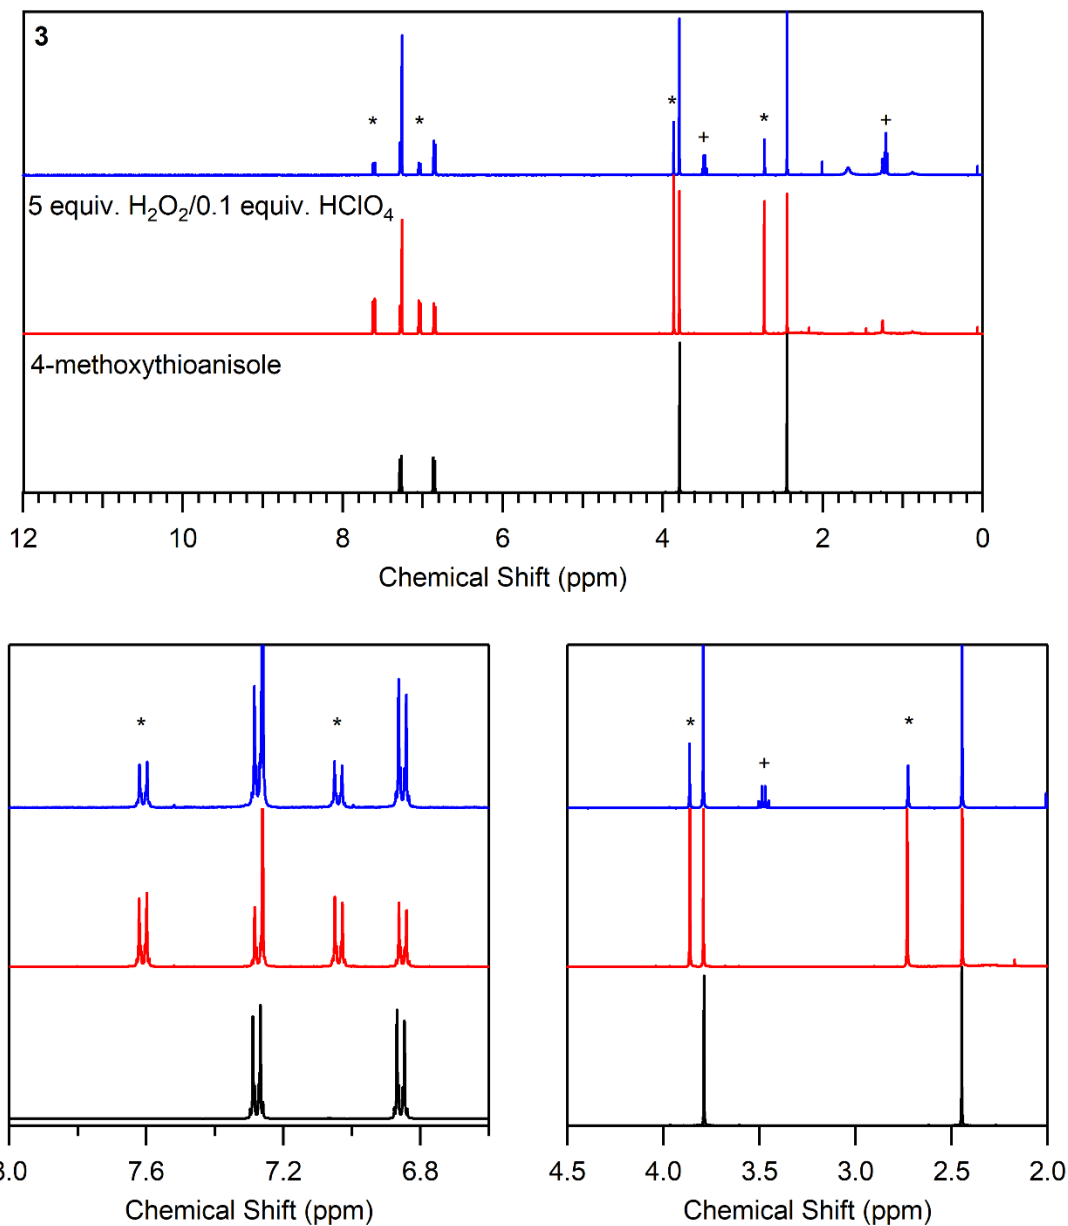

**Figure S16.** Top:  $^1\text{H}$  NMR spectra for the organic products resulting from the reactions of a 1.25 mM solution of **3**, formed by the addition of 5 equiv.  $\text{H}_2\text{O}_2$  and 0.1 equiv.  $\text{HClO}_4$ , with 5 equiv. 4-methoxythioanisole (blue trace), and the reaction of 4-methoxyanisole with  $\text{H}_2\text{O}_2$  and  $\text{HClO}_4$  in the absence of **3** (red trace). The  $^1\text{H}$  NMR spectrum of 4-methoxyanisole is included for comparison (black trace). Bottom: Expanded region from 8 – 6.5 ppm (left) and 4.5 – 2 ppm (right). Legend: + ethanol; \* 1-methoxy-4-(methylsulfinyl)benzene.

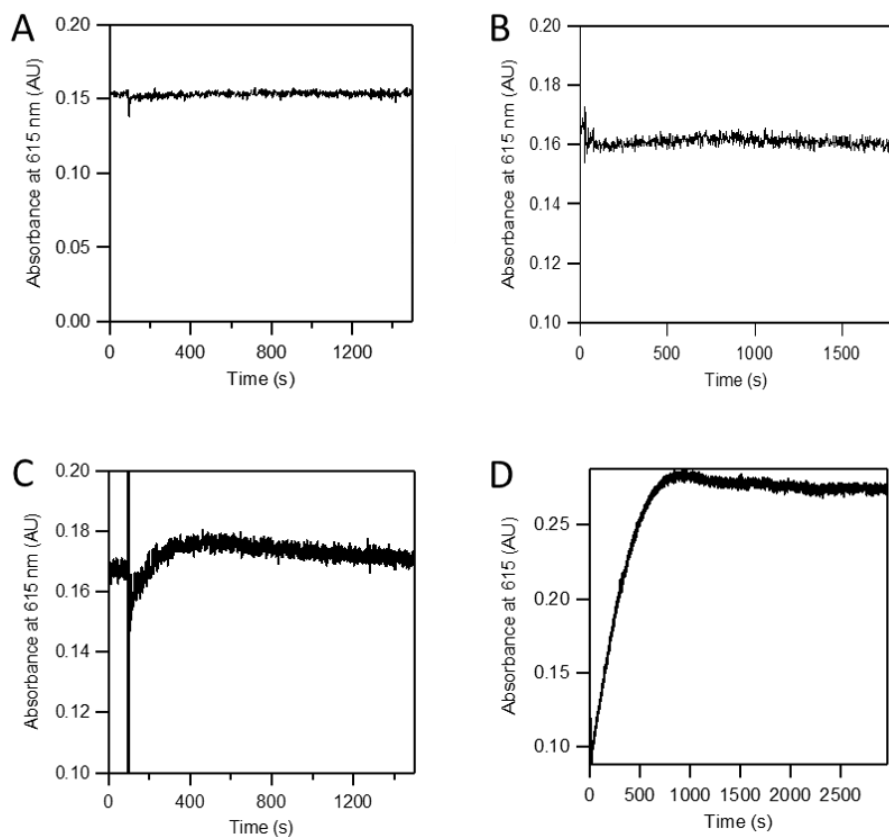

**Figure S17.** Time traces for the reactions of **4** with 100 equiv. of various substrates. There are no spectral changes after the addition of DHA (panel A), CHD (panel B), or 2,4,6-tri-*tert*-butylphenol (panel C) indicating that no reaction takes place with these substrates. The addition of 100 equivalents of TEMPOH results the formation of a precipitate (panel D).



**Cartesian Coordinates from DFT optimized structures. All calculations were performed for S = 2 systems.**

**[Mn<sup>III</sup>(OH)(dpaq<sup>2Me</sup>)]<sup>+</sup>**

|    |              |              |              |
|----|--------------|--------------|--------------|
| 25 | 0.000000000  | 0.000000000  | 0.000000000  |
| 8  | 1.756000000  | 0.387000000  | -3.667000000 |
| 8  | 0.000000000  | 0.000000000  | 1.835000000  |
| 1  | -0.150000000 | 0.874000000  | 2.237000000  |
| 7  | -2.039000000 | 0.000000000  | -0.549000000 |
| 7  | 0.209000000  | 0.080000000  | -1.945000000 |
| 7  | 2.208000000  | -0.054000000 | -0.080000000 |
| 7  | 0.516000000  | 2.158000000  | -0.091000000 |
| 7  | 0.498000000  | -2.153000000 | 0.037000000  |
| 6  | -3.137000000 | -0.131000000 | 0.218000000  |
| 6  | -4.431000000 | 0.024000000  | -0.347000000 |
| 1  | -5.302000000 | -0.091000000 | 0.304000000  |
| 6  | -4.584000000 | 0.313000000  | -1.690000000 |
| 1  | -5.582000000 | 0.440000000  | -2.123000000 |
| 6  | -3.442000000 | 0.432000000  | -2.524000000 |
| 6  | -3.505000000 | 0.702000000  | -3.919000000 |
| 1  | -4.481000000 | 0.844000000  | -4.393000000 |
| 6  | -2.331000000 | 0.775000000  | -4.652000000 |
| 1  | -2.371000000 | 0.981000000  | -5.726000000 |
| 6  | -1.063000000 | 0.580000000  | -4.050000000 |
| 1  | -0.153000000 | 0.631000000  | -4.647000000 |
| 6  | -0.962000000 | 0.314000000  | -2.678000000 |
| 6  | -2.165000000 | 0.252000000  | -1.904000000 |
| 6  | 1.469000000  | 0.140000000  | -2.497000000 |
| 6  | 2.587000000  | -0.225000000 | -1.512000000 |
| 1  | 2.826000000  | -1.288000000 | -1.687000000 |
| 1  | 3.487000000  | 0.360000000  | -1.760000000 |
| 6  | 2.674000000  | 1.237000000  | 0.485000000  |
| 1  | 3.748000000  | 1.399000000  | 0.285000000  |
| 1  | 2.525000000  | 1.179000000  | 1.576000000  |
| 6  | 1.847000000  | 2.383000000  | -0.057000000 |
| 6  | 2.392000000  | 3.602000000  | -0.469000000 |
| 1  | 3.475000000  | 3.755000000  | -0.442000000 |
| 6  | 1.531000000  | 4.613000000  | -0.919000000 |
| 1  | 1.934000000  | 5.574000000  | -1.253000000 |
| 6  | 0.152000000  | 4.370000000  | -0.944000000 |
| 1  | -0.553000000 | 5.130000000  | -1.291000000 |
| 6  | -0.314000000 | 3.121000000  | -0.525000000 |
| 1  | -1.379000000 | 2.870000000  | -0.542000000 |

|   |              |              |              |
|---|--------------|--------------|--------------|
| 6 | 2.603000000  | -1.210000000 | 0.764000000  |
| 1 | 3.683000000  | -1.431000000 | 0.677000000  |
| 1 | 2.375000000  | -0.938000000 | 1.808000000  |
| 6 | 1.772000000  | -2.419000000 | 0.389000000  |
| 6 | 2.260000000  | -3.730000000 | 0.424000000  |
| 1 | 3.301000000  | -3.921000000 | 0.702000000  |
| 6 | 1.395000000  | -4.783000000 | 0.098000000  |
| 1 | 1.752000000  | -5.817000000 | 0.119000000  |
| 6 | 0.073000000  | -4.493000000 | -0.265000000 |
| 1 | -0.630000000 | -5.285000000 | -0.534000000 |
| 6 | -0.333000000 | -3.156000000 | -0.287000000 |
| 1 | -1.348000000 | -2.866000000 | -0.576000000 |
| 6 | -2.993000000 | -0.434000000 | 1.683000000  |
| 1 | -2.144000000 | -1.103000000 | 1.881000000  |
| 1 | -2.803000000 | 0.495000000  | 2.251000000  |
| 1 | -3.923000000 | -0.877000000 | 2.071000000  |

**[Mn<sup>III</sup>(OOH)(dpaq<sup>2Me</sup>)]<sup>+</sup>**

|    |              |              |              |
|----|--------------|--------------|--------------|
| 25 | 0.000000000  | 0.000000000  | 0.000000000  |
| 8  | 1.772000000  | 0.278000000  | -3.676000000 |
| 8  | 0.000000000  | 0.000000000  | 1.856000000  |
| 7  | -2.045000000 | 0.000000000  | -0.572000000 |
| 7  | 0.208000000  | 0.058000000  | -1.955000000 |
| 7  | 2.227000000  | -0.261000000 | -0.112000000 |
| 7  | 0.738000000  | 2.070000000  | -0.134000000 |
| 7  | 0.341000000  | -2.183000000 | 0.106000000  |
| 6  | -3.151000000 | -0.159000000 | 0.173000000  |
| 6  | -4.431000000 | 0.149000000  | -0.367000000 |
| 1  | -5.311000000 | 0.015000000  | 0.268000000  |
| 6  | -4.556000000 | 0.606000000  | -1.664000000 |
| 1  | -5.540000000 | 0.853000000  | -2.077000000 |
| 6  | -3.402000000 | 0.735000000  | -2.486000000 |
| 6  | -3.438000000 | 1.155000000  | -3.844000000 |
| 1  | -4.398000000 | 1.418000000  | -4.298000000 |
| 6  | -2.258000000 | 1.214000000  | -4.569000000 |
| 1  | -2.278000000 | 1.533000000  | -5.616000000 |
| 6  | -1.011000000 | 0.861000000  | -3.997000000 |
| 1  | -0.098000000 | 0.898000000  | -4.590000000 |
| 6  | -0.937000000 | 0.450000000  | -2.659000000 |
| 6  | -2.146000000 | 0.401000000  | -1.893000000 |
| 6  | 1.464000000  | 0.017000000  | -2.513000000 |
| 6  | 2.540000000  | -0.504000000 | -1.550000000 |
| 1  | 2.606000000  | -1.593000000 | -1.711000000 |
| 1  | 3.513000000  | -0.066000000 | -1.826000000 |

|   |              |              |              |
|---|--------------|--------------|--------------|
| 6 | 2.831000000  | 0.994000000  | 0.393000000  |
| 1 | 3.906000000  | 1.056000000  | 0.142000000  |
| 1 | 2.734000000  | 0.980000000  | 1.492000000  |
| 6 | 2.082000000  | 2.194000000  | -0.144000000 |
| 6 | 2.704000000  | 3.367000000  | -0.581000000 |
| 1 | 3.796000000  | 3.439000000  | -0.587000000 |
| 6 | 1.906000000  | 4.436000000  | -1.012000000 |
| 6 | 0.512000000  | 4.299000000  | -0.989000000 |
| 1 | -0.145000000 | 5.108000000  | -1.317000000 |
| 6 | -0.033000000 | 3.091000000  | -0.544000000 |
| 1 | -1.114000000 | 2.922000000  | -0.513000000 |
| 6 | 2.546000000  | -1.427000000 | 0.748000000  |
| 1 | 3.597000000  | -1.751000000 | 0.632000000  |
| 1 | 2.394000000  | -1.113000000 | 1.795000000  |
| 6 | 1.595000000  | -2.560000000 | 0.430000000  |
| 6 | 1.961000000  | -3.910000000 | 0.481000000  |
| 1 | 2.987000000  | -4.190000000 | 0.737000000  |
| 6 | 0.994000000  | -4.884000000 | 0.199000000  |
| 6 | -0.304000000 | -4.479000000 | -0.139000000 |
| 1 | -1.084000000 | -5.207000000 | -0.377000000 |
| 6 | -0.587000000 | -3.111000000 | -0.179000000 |
| 1 | -1.576000000 | -2.733000000 | -0.450000000 |
| 6 | -3.042000000 | -0.687000000 | 1.575000000  |
| 1 | -2.044000000 | -1.096000000 | 1.781000000  |
| 1 | -3.227000000 | 0.121000000  | 2.304000000  |
| 1 | -3.809000000 | -1.463000000 | 1.740000000  |
| 1 | 2.368000000  | 5.361000000  | -1.368000000 |
| 1 | 1.254000000  | -5.946000000 | 0.232000000  |
| 8 | -0.792000000 | 1.171000000  | 2.242000000  |
| 1 | -0.088000000 | 1.782000000  | 2.543000000  |

**[Mn<sup>III</sup>(O<sub>2</sub>)(dpaq<sup>2Me</sup>)] – Quinoline Bound**

|    |              |             |              |
|----|--------------|-------------|--------------|
| 25 | 1.970982000  | 7.777498000 | 7.952709000  |
| 8  | 3.859555000  | 4.041205000 | 7.688540000  |
| 8  | 1.563145000  | 9.450207000 | 7.316355000  |
| 7  | 1.289760000  | 7.285535000 | 10.272560000 |
| 7  | 2.810825000  | 5.957684000 | 8.535370000  |
| 7  | 2.413093000  | 6.922226000 | 5.954879000  |
| 7  | 4.341472000  | 8.134369000 | 7.576013000  |
| 7  | 0.078183000  | 6.717104000 | 7.251789000  |
| 6  | 0.490287000  | 7.990768000 | 11.070828000 |
| 6  | 0.626988000  | 7.935473000 | 12.489976000 |
| 1  | -0.050076000 | 8.525115000 | 13.116022000 |
| 6  | 1.607216000  | 7.143578000 | 13.055905000 |

|   |              |             |              |
|---|--------------|-------------|--------------|
| 1 | 1.729867000  | 7.093521000 | 14.143381000 |
| 6 | 2.471962000  | 6.380069000 | 12.219854000 |
| 6 | 3.506852000  | 5.537160000 | 12.714940000 |
| 1 | 3.665158000  | 5.457095000 | 13.795595000 |
| 6 | 4.296635000  | 4.834012000 | 11.815588000 |
| 1 | 5.099540000  | 4.187228000 | 12.187188000 |
| 6 | 4.096706000  | 4.927865000 | 10.415908000 |
| 1 | 4.731482000  | 4.361925000 | 9.734182000  |
| 6 | 3.089642000  | 5.746719000 | 9.881928000  |
| 6 | 2.262856000  | 6.487569000 | 10.805828000 |
| 6 | 3.228806000  | 5.112193000 | 7.560823000  |
| 6 | 2.750267000  | 5.482982000 | 6.150566000  |
| 1 | 1.842318000  | 4.884960000 | 5.966236000  |
| 1 | 3.505062000  | 5.158508000 | 5.414529000  |
| 6 | 3.551277000  | 7.668344000 | 5.356047000  |
| 1 | 3.870631000  | 7.201011000 | 4.407591000  |
| 1 | 3.191575000  | 8.687750000 | 5.140801000  |
| 6 | 4.697206000  | 7.748284000 | 6.335504000  |
| 6 | 6.025562000  | 7.458674000 | 5.998707000  |
| 1 | 6.279522000  | 7.138019000 | 4.983929000  |
| 6 | 7.011721000  | 7.586466000 | 6.987544000  |
| 1 | 8.058432000  | 7.364547000 | 6.756574000  |
| 6 | 6.635892000  | 7.994391000 | 8.273768000  |
| 1 | 7.373838000  | 8.105101000 | 9.073761000  |
| 6 | 5.282158000  | 8.255418000 | 8.522102000  |
| 1 | 4.935072000  | 8.568806000 | 9.512340000  |
| 6 | 1.185607000  | 7.100510000 | 5.140110000  |
| 1 | 1.266546000  | 6.593358000 | 4.161761000  |
| 1 | 1.068021000  | 8.181667000 | 4.953861000  |
| 6 | -0.004745000 | 6.581867000 | 5.911966000  |
| 6 | -1.112423000 | 5.985504000 | 5.296892000  |
| 1 | -1.142338000 | 5.880631000 | 4.208482000  |
| 6 | -2.161914000 | 5.521311000 | 6.099788000  |
| 1 | -3.040492000 | 5.052837000 | 5.645522000  |
| 6 | -2.058277000 | 5.646057000 | 7.491655000  |
| 1 | -2.844090000 | 5.277845000 | 8.157211000  |
| 6 | -0.914483000 | 6.246734000 | 8.025026000  |
| 1 | -0.768863000 | 6.351099000 | 9.102767000  |
| 6 | -0.586592000 | 8.834813000 | 10.443073000 |
| 1 | -0.463706000 | 8.870650000 | 9.351642000  |
| 1 | -0.549381000 | 9.866014000 | 10.835476000 |
| 1 | -1.585333000 | 8.429120000 | 10.691663000 |
| 8 | 1.931068000  | 9.546970000 | 8.708875000  |

**[Mn<sup>III</sup>(O<sub>2</sub>)(dpaq<sup>2Me</sup>)] – Quinoline Dissociated**

|    |             |              |              |
|----|-------------|--------------|--------------|
| 25 | 2.426424000 | 7.553832000  | 8.099344000  |
| 8  | 5.083487000 | 4.450649000  | 8.496531000  |
| 8  | 1.409163000 | 9.092518000  | 7.976327000  |
| 7  | 2.512734000 | 3.456709000  | 9.450504000  |
| 7  | 3.436862000 | 6.049485000  | 8.928314000  |
| 7  | 3.013618000 | 6.491046000  | 6.217275000  |
| 7  | 4.249553000 | 8.636073000  | 7.247770000  |
| 7  | 0.798342000 | 6.036799000  | 7.843569000  |
| 6  | 2.092124000 | 2.220755000  | 9.671907000  |
| 6  | 1.728201000 | 1.760592000  | 10.974741000 |
| 1  | 1.386405000 | 0.728986000  | 11.112292000 |
| 6  | 1.805480000 | 2.630903000  | 12.043006000 |
| 1  | 1.516520000 | 2.313205000  | 13.051603000 |
| 6  | 2.270417000 | 3.961807000  | 11.840169000 |
| 6  | 2.356098000 | 4.922767000  | 12.884987000 |
| 1  | 2.065632000 | 4.636162000  | 13.901722000 |
| 6  | 2.794974000 | 6.207716000  | 12.601134000 |
| 1  | 2.852557000 | 6.957163000  | 13.397645000 |
| 6  | 3.181432000 | 6.567992000  | 11.289304000 |
| 1  | 3.523294000 | 7.585347000  | 11.077311000 |
| 6  | 3.136518000 | 5.650913000  | 10.237619000 |
| 6  | 2.642562000 | 4.320215000  | 10.497529000 |
| 6  | 4.250455000 | 5.288351000  | 8.141942000  |
| 6  | 4.135505000 | 5.581634000  | 6.635343000  |
| 1  | 4.042323000 | 4.610618000  | 6.119279000  |
| 1  | 5.087462000 | 6.032435000  | 6.312192000  |
| 6  | 3.488082000 | 7.511034000  | 5.253468000  |
| 1  | 3.954221000 | 7.051972000  | 4.358764000  |
| 1  | 2.607630000 | 8.087851000  | 4.917108000  |
| 6  | 4.457544000 | 8.458955000  | 5.931589000  |
| 6  | 5.471784000 | 9.139199000  | 5.246624000  |
| 1  | 5.631899000 | 8.962179000  | 4.178228000  |
| 6  | 6.270577000 | 10.044443000 | 5.958175000  |
| 1  | 7.071234000 | 10.591797000 | 5.450576000  |
| 6  | 6.033939000 | 10.233695000 | 7.326173000  |
| 6  | 5.010384000 | 9.499730000  | 7.934762000  |
| 1  | 4.774566000 | 9.595808000  | 8.999052000  |
| 6  | 1.839516000 | 5.749843000  | 5.691296000  |
| 1  | 2.150625000 | 4.944419000  | 4.998860000  |
| 1  | 1.232689000 | 6.472705000  | 5.118161000  |

|   |              |              |             |
|---|--------------|--------------|-------------|
| 6 | 0.973850000  | 5.198287000  | 6.805637000 |
| 6 | 0.337621000  | 3.955848000  | 6.744877000 |
| 1 | 0.499633000  | 3.294645000  | 5.887911000 |
| 6 | -0.499643000 | 3.577164000  | 7.803680000 |
| 1 | -1.003654000 | 2.605932000  | 7.788846000 |
| 6 | -0.663279000 | 4.447983000  | 8.886538000 |
| 1 | -1.292685000 | 4.181985000  | 9.740230000 |
| 6 | 0.011106000  | 5.673463000  | 8.867890000 |
| 1 | -0.066016000 | 6.395361000  | 9.686946000 |
| 6 | 2.032110000  | 1.285347000  | 8.487529000 |
| 1 | 2.246747000  | 1.843471000  | 7.564511000 |
| 1 | 1.045523000  | 0.793894000  | 8.403180000 |
| 1 | 2.786591000  | 0.483759000  | 8.593868000 |
| 8 | 1.854737000  | 8.806329000  | 9.323914000 |
| 1 | 6.636678000  | 10.930629000 | 7.915563000 |

## References

1. Rice, D. B.; Wijeratne, G. B.; Burr, A. D.; Parham, J. D.; Day, V. W.; Jackson, T. A., Steric and Electronic Influence on Proton-Coupled Electron-Transfer Reactivity of a Mononuclear Mn(III)-Hydroxo Complex. *Inorg Chem* **2016**, *55* (16), 8110-20.
2. Leto, D. F.; Chattopadhyay, S.; Day, V. W.; Jackson, T. A., Reaction landscape of a pentadentate N5-ligated Mn(II) complex with O<sub>2</sub> - and H<sub>2</sub>O<sub>2</sub> includes conversion of a peroxomanganese(III) adduct to a bis( $\mu$ -oxo)dimanganese(III,IV) species. *Dalton Trans* **2013**, *42* (36), 13014-25.
3. Lee, Y.; Jackson, T. A., Ligand Influence on Structural Properties and Reactivity of Bis( $\mu$ -oxo)dimanganese(III,IV) Species and Comparison of Reactivity with Terminal MnIV-oxo Complexes. *ChemistrySelect* **2018**, *3* (47), 13507-13516.
4. Sankaralingam, M.; Jeon, S. H.; Lee, Y.-M.; Seo, M. S.; Ohkubo, K.; Fukuzumi, S.; Nam, W., An amphoteric reactivity of a mixed-valent bis( $\mu$ -oxo)dimanganese(III,IV) complex acting as an electrophile and a nucleophile. *Dalton Trans.* **2016**, *45* (1), 376-383.
